# Supplementary material for: Calcium Absorption from Food Products: Food Matrix Effects
Source: MDPI journal article supplement (doi:10.3390/nu14010180), 2021-12-30
Supplement: s1 [file s1]

**Table S1.** Percentage of various nutrients supplied by the portion size determined to supply 20% of total required calcium (1000 mg/day) for Dutch adult. Portion sizes are outlined in Table 9.

| Food Item                    | Food Category          | Protein | LA    | ALA  | Fibre | Calcium | Iodine | Phosphorus | Selenium | Iron | Copper | Magnesium | Zinc | Cobalamin | Folate | Niacin | Riboflavin | Thiamin | Vitamin A | Vitamin B <sub>6</sub> | Vitamin C | Vitamin D | Vitamin K |
|------------------------------|------------------------|---------|-------|------|-------|---------|--------|------------|----------|------|--------|-----------|------|-----------|--------|--------|------------|---------|-----------|------------------------|-----------|-----------|-----------|
| Seaweed kelp, raw            | Miscellaneous          | 3.5     | 0.2   | 0.0  | 6.2   | 20.0    | 5994   | 9.1        | 1.7      | 0.0  | 9.7    | 41.2      | 15.6 | 0.0       | 64.9   | 37.2   | 11.2       | 6.3     | 1.9       | 0.1                    | 3.2       | 0.0       | 0.0       |
| Flax seed                    | Nuts and seeds         | 25.6    | 31.1  | 1042 | 109.2 | 20.0    | 0.3    | 94.1       | 0.0      | 0.0  | 0.0    | 40.6      | 65.1 | 0.0       | 20.7   | 152.0  | 7.8        | 136.1   | 0.0       | 0.0                    | 0.0       | 0.0       | 0.0       |
| Kale                         | Vegetable              | 4.0     | 1.1   | 18.0 | 12.1  | 20.0    | 1.2    | 7.2        | 2.5      | 0.0  | 1.6    | 3.2       | 1.8  | 0.0       | 25.4   | 21.6   | 1.6        | 0.0     | 40.4      | 4.6                    | 19.7      | 0.0       | 1011      |
| Vegetarian schnitzel         | Meat/dairy substitutes | 5.3     | 10.7  | 0.2  | 5.0   | 20.0    | 0.0    | 26.4       | 1.8      | 0.0  | 0.0    | 1.4       | 4.0  | 3.0       | 0.9    | 0.0    | 2.7        | 2.9     | 0.0       | 6.6                    | 0.0       | 0.0       | 0.0       |
| Cheese, 20+                  | Dairy                  | 11.2    | 0.4   | 2.4  | 0.0   | 20.0    | 2.9    | 24.4       | 4.0      | 0.0  | 0.6    | 2.3       | 9.4  | 13.2      | 1.6    | 1.2    | 4.7        | 0.6     | 2.6       | 0.5                    | 0.2       | 0.1       | 9.4       |
| Cheese Edam, 40+             | Dairy                  | 9.8     | 0.9   | 5.5  | 0.0   | 20.0    | 2.7    | 24.4       | 2.6      | 0.0  | 0.6    | 2.0       | 9.0  | 10.5      | 1.7    | 1.4    | 2.9        | 0.7     | 6.6       | 0.8                    | 0.2       | 0.4       | 0.7       |
| Lettuce, medium              | Vegetable              | 9.1     | 1.9   | 18.1 | 19.6  | 20.0    | 4.8    | 24.0       | 0.0      | 0.0  | 9.4    | 16.2      | 13.2 | 0.0       | 28.0   | 70.8   | 11.8       | 20.0    | 65.9      | 13.3                   | 3.4       | 0.0       | 400.0     |
| Herring in tomato sauce      | Fish                   | 34.4    | 5.9   | 13.9 | 0.0   | 20.0    | 16.0   | 60.6       | 45.7     | 6.1  | 10.0   | 23.2      | 7.5  | 346.7     | 4.0    | 441.7  | 16.7       | 0.0     | 7.3       | 7.8                    | 0.0       | 55.1      | 0.0       |
| Spinach, frozen              | Vegetable              | 4.9     | 0.5   | 20.7 | 11.9  | 20.0    | 1.6    | 9.9        | 0.0      | 0.0  | 6.9    | 12.0      | 10.9 | 0.0       | 23.6   | 84.9   | 8.5        | 7.8     | 105.5     | 3.6                    | 9.0       | 0.0       | 1014      |
| Buttermilk                   | Dairy                  | 9.5     | 0.0   | 0.0  | 0.0   | 20.0    | 18.2   | 30.0       | 2.6      | 0.0  | 1.1    | 5.2       | 8.0  | 7.8       | 4.3    | 11.5   | 17.2       | 3.9     | 0.7       | 3.2                    | 0.0       | 0.0       | 6.6       |
| Lettuce, crop                | Vegetable              | 9.8     | 3.3   | 35.9 | 19.6  | 20.0    | 6.8    | 26.7       | 0.0      | 0.0  | 10.2   | 17.5      | 17.8 | 0.0       | 35.1   | 76.5   | 15.3       | 21.6    | 75.6      | 10.8                   | 0.0       | 0.0       | 752.2     |
| Yoghurt, low-fat             | Dairy                  | 9.3     | 0.0   | 0.0  | 0.0   | 20.0    | 13.1   | 28.2       | 1.9      | 0.0  | 0.8    | 4.9       | 8.5  | 9.2       | 5.1    | 8.2    | 14.0       | 2.8     | 0.4       | 3.1                    | 1.2       | 0.0       | 0.2       |
| Root                         | Vegetable              | 8.9     | 11.1  | 5.9  | 85.9  | 20.0    | 12.3   | 39.1       | 0.0      | 0.0  | 18.5   | 14.8      | 17.3 | 0.0       | 62.4   | 277.8  | 13.9       | 23.5    | 1373      | 34.9                   | 20.2      | 0.0       | 78.3      |
| Onion                        | Vegetable              | 15.4    | 3.4   | 0.0  | 74.5  | 20.0    | 13.8   | 41.4       | 9.9      | 0.0  | 25.9   | 17.7      | 21.3 | 0.0       | 49.5   | 86.2   | 4.3        | 29.2    | 0.0       | 48.7                   | 31.3      | 0.0       | 3.9       |
| Milk, skim                   | Dairy                  | 10.1    | 0.0   | 0.0  | 0.0   | 20.0    | 15.8   | 30.6       | 2.3      | 0.0  | 1.0    | 5.4       | 7.8  | 17.5      | 3.4    | 19.8   | 17.9       | 6.7     | 0.2       | 3.7                    | 0.0       | 0.0       | 0.0       |
| Cheese Gouda, 48+            | Dairy                  | 9.7     | 1.2   | 7.6  | 0.0   | 20.0    | 3.4    | 24.0       | 4.2      | 0.0  | 0.6    | 2.3       | 9.0  | 12.3      | 1.9    | 1.5    | 4.3        | 0.3     | 11.3      | 0.6                    | 0.0       | 0.5       | 23.7      |
| Yoghurt, whole               | Dairy                  | 9.1     | 0.6   | 1.1  | 0.0   | 20.0    | 13.9   | 29.0       | 4.0      | 0.0  | 0.9    | 5.2       | 7.9  | 8.4       | 5.3    | 17.5   | 14.0       | 3.0     | 6.0       | 2.5                    | 0.0       | 0.0       | 2.6       |
| Milk, semi-skimmed           | Dairy                  | 9.5     | 0.3   | 1.3  | 0.0   | 20.0    | 16.2   | 30.7       | 2.3      | 0.0  | 1.0    | 5.6       | 7.1  | 18.3      | 3.2    | 10.2   | 18.3       | 6.9     | 3.5       | 2.9                    | 1.5       | 0.0       | 1.6       |
| Yoghurt, semi-skimmed        | Dairy                  | 10.4    | 0.3   | 1.2  | 0.0   | 20.0    | 14.3   | 23.0       | 2.1      | 0.0  | 0.9    | 4.9       | 6.9  | 14.0      | 3.9    | 9.0    | 18.0       | 4.6     | 3.3       | 2.5                    | 2.6       | 0.0       | 1.4       |
| Yoghurt, low-fat with fruits | Dairy                  | 9.1     | 0.0   | 0.0  | 0.6   | 20.0    | 13.1   | 28.5       | 2.2      | 0.0  | 1.9    | 5.3       | 8.6  | 8.9       | 5.3    | 19.4   | 13.6       | 3.3     | 0.6       | 2.7                    | 1.4       | 0.0       | 0.4       |
| Milk, whole                  | Dairy                  | 9.2     | 0.8   | 2.6  | 0.0   | 20.0    | 16.0   | 30.5       | 4.6      | 0.0  | 1.0    | 5.5       | 7.9  | 16.1      | 3.2    | 10.1   | 18.1       | 5.1     | 8.0       | 2.8                    | 0.0       | 0.0       | 3.2       |
| Almonds, peeled              | Nuts and seeds         | 26.4    | 101.8 | 0.0  | 19.8  | 20.0    | 1.2    | 80.3       | 2.0      | 0.0  | 28.7   | 61.6      | 23.3 | 0.0       | 5.6    | 189.9  | 30.9       | 11.2    | 0.1       | 2.5                    | 0.0       | 0.0       | 0.0       |
| Old cheese, 48+              | Dairy                  | 11.3    | 1.4   | 8.9  | 0.0   | 20.0    | 3.1    | 25.6       | 0.0      | 0.0  | 1.7    | 2.6       | 10.6 | 12.1      | 2.2    | 1.7    | 3.4        | 0.9     | 12.4      | 1.0                    | 0.2       | 0.5       | 26.1      |
| Cheese spread, 48+           | Dairy                  | 9.8     | 1.6   | 7.9  | 0.9   | 20.0    | 2.6    | 60.8       | 4.9      | 0.0  | 0.8    | 2.6       | 9.1  | 6.9       | 1.7    | 2.7    | 6.4        | 0.9     | 12.3      | 0.4                    | 0.4       | 0.0       | 7.8       |
| Green beans (plastic)        | Vegetable              | 11.5    | 2.2   | 17.8 | 43.0  | 20.0    | 7.4    | 28.3       | 0.0      | 0.0  | 18.5   | 28.6      | 14.6 | 0.0       | 56.9   | 115.7  | 18.5       | 23.5    | 26.2      | 15.5                   | 3.4       | 0.0       | 84.7      |
| figs                         | Fruit                  | 6.4     | 0.0   | 0.0  | 29.6  | 20.0    | 0.0    | 21.5       | 0.0      | 0.0  | 13.9   | 15.9      | 11.8 | 0.0       | 9.0    | 115.7  | 11.6       | 23.5    | 12.3      | 24.0                   | 10.1      | 0.0       | 24.9      |

|                                  |                        |      |      |       |       |      |       |       |       |     |      |      |      |       |       |       |      |      |       |      |       |       |       |
|----------------------------------|------------------------|------|------|-------|-------|------|-------|-------|-------|-----|------|------|------|-------|-------|-------|------|------|-------|------|-------|-------|-------|
| Figs, dried                      | Fruit                  | 7.0  | 4.3  | 0.0   | 48.4  | 20.0 | 0.0   | 15.0  | 1.8   | 0.0 | 22.4 | 24.0 | 7.2  | 0.0   | 3.4   | 46.3  | 6.2  | 11.8 | 1.8   | 8.0  | 1.1   | 0.0   | 27.5  |
| Yoghurt drink, sweetener         | Dairy                  | 10.4 | 0.0  | 0.0   | 0.0   | 20.0 | 16.2  | 27.2  | 2.8   | 0.0 | 1.2  | 5.5  | 6.2  | 12.6  | 4.7   | 12.1  | 15.8 | 6.2  | 0.3   | 3.4  | 1.8   | 0.0   | 0.3   |
| Tofu                             | Meat/dairy substitutes | 21.2 | 36.6 | 39.1  | 1.3   | 20.0 | 0.0   | 25.1  | 0.0   | 0.0 | 0.0  | 21.3 | 12.4 | 0.0   | 4.8   | 6.6   | 1.3  | 7.9  | 0.0   | 0.0  | 0.0   | 0.0   | 0.0   |
| Chicory                          | vegetable              | 20.3 | 6.4  | 7.3   | 43.6  | 20.0 | 2.4   | 56.2  | 0.0   | 0.0 | 51.1 | 26.0 | 19.3 | 0.0   | 27.5  | 113.6 | 17.0 | 48.1 | 0.0   | 19.8 | 0.0   | 0.0   | 0.0   |
| Green beans frozen (plastic)     | Vegetable              | 9.0  | 0.6  | 4.6   | 24.3  | 20.0 | 5.8   | 19.5  | 0.0   | 0.0 | 10.9 | 16.6 | 7.7  | 0.0   | 14.9  | 72.5  | 9.1  | 15.3 | 24.7  | 2.0  | 13.2  | 0.0   | 99.4  |
| Custard, vanilla                 | Dairy                  | 8.8  | 0.9  | 1.9   | 1.9   | 20.0 | 18.4  | 30.4  | 3.3   | 0.0 | 1.5  | 6.0  | 7.2  | 14.5  | 1.4   | 14.5  | 17.4 | 4.9  | 9.0   | 4.1  | 0.0   | 0.0   | 4.0   |
| Chocolate milk, semi-skimmed     | Dairy                  | 11.1 | 0.6  | 1.6   | 3.9   | 20.0 | 17.5  | 33.5  | 2.8   | 0.0 | 7.4  | 10.1 | 10.2 | 6.9   | 2.4   | 24.5  | 18.4 | 6.2  | 3.9   | 1.2  | 0.0   | 1.3   | 0.6   |
| Kiwi                             | Fruit                  | 10.3 | 10.7 | 64.0  | 61.3  | 20.0 | 0.0   | 41.2  | 9.5   | 0.0 | 50.0 | 26.7 | 14.9 | 0.0   | 69.1  | 125.0 | 8.3  | 7.1  | 6.2   | 28.2 | 478.8 | 0.0   | 104.8 |
| Chocolate milk, whole            | Dairy                  | 11.8 | 1.2  | 1.6   | 3.9   | 20.0 | 17.5  | 31.0  | 2.8   | 0.0 | 3.7  | 10.6 | 9.6  | 16.2  | 2.4   | 24.5  | 18.4 | 4.1  | 8.4   | 3.5  | 3.6   | 0.0   | 0.8   |
| Custard, whole, various flavors  | Dairy                  | 11.3 | 1.3  | 2.5   | 1.3   | 20.0 | 24.8  | 25.6  | 0.0   | 0.0 | 5.9  | 5.4  | 9.0  | 14.8  | 1.9   | 19.5  | 19.5 | 6.6  | 10.8  | 3.7  | 2.8   | 0.0   | 5.4   |
| Orange                           | Fruit                  | 12.0 | 24.3 | 76.5  | 69.6  | 20.0 | 14.5  | 37.9  | 0.0   | 0.0 | 21.7 | 24.8 | 15.7 | 0.0   | 85.9  | 217.4 | 16.3 | 55.2 | 17.4  | 30.7 | 403.2 | 0.0   | 1.2   |
| Tangerine                        | Fruit                  | 9.6  | 3.2  | 12.8  | 28.8  | 20.0 | 0.0   | 27.6  | 0.0   | 0.0 | 15.0 | 22.9 | 6.8  | 0.0   | 54.8  | 150.0 | 15.0 | 59.3 | 42.7  | 35.8 | 290.9 | 0.0   | 1.1   |
| Cottage cheese, whole            | Dairy                  | 19.3 | 1.9  | 5.1   | 0.0   | 20.0 | 15.9  | 43.6  | 0.0   | 0.0 | 2.0  | 5.5  | 9.0  | 28.0  | 5.3   | 10.0  | 25.0 | 10.2 | 26.7  | 3.8  | 1.5   | 0.0   | 58.3  |
| Green beans (can)                | Vegetable              | 11.2 | 2.0  | 16.3  | 42.4  | 20.0 | 8.2   | 14.8  | 0.0   | 0.0 | 20.4 | 14.0 | 11.3 | 0.0   | 33.4  | 102.0 | 12.8 | 13.0 | 26.7  | 7.2  | 11.1  | 0.0   | 93.3  |
| Canned salmon, wild caught       | Fish                   | 77.2 | 2.4  | 12.3  | 0.0   | 20.0 | 86.4  | 67.9  | 78.5  | 4.0 | 6.9  | 15.7 | 18.7 | 219.8 | 8.0   | 810.4 | 30.2 | 4.7  | 9.1   | 27.1 | 0.0   | 159.7 | 0.0   |
| Green beans (glass)              | Vegetable              | 11.2 | 2.0  | 16.3  | 42.4  | 20.0 | 8.2   | 14.8  | 0.0   | 0.0 | 20.4 | 14.0 | 11.3 | 0.0   | 33.4  | 102.0 | 12.8 | 13.0 | 26.7  | 7.2  | 11.1  | 0.0   | 93.3  |
| Cream/vanilla ice cream          | Dairy                  | 10.4 | 3.5  | 9.3   | 2.3   | 20.0 | 12.6  | 30.7  | 5.5   | 0.0 | 1.2  | 7.2  | 4.1  | 19.9  | 1.1   | 12.1  | 26.7 | 8.2  | 48.2  | 4.2  | 0.0   | 1.3   | 8.9   |
| Mozzarella                       | Dairy                  | 40.2 | 3.3  | 9.0   | 0.0   | 20.0 | 15.0  | 79.5  | 5.4   | 0.0 | 0.0  | 3.6  | 34.6 | 53.1  | 7.6   | 31.3  | 21.1 | 4.0  | 47.2  | 7.4  | 0.0   | 1.7   | 20.7  |
| Cauliflower                      | Vegetable              | 24.8 | 2.4  | 108.8 | 73.6  | 20.0 | 13.3  | 68.4  | 0.0   | 0.0 | 25.0 | 20.6 | 22.1 | 0.0   | 230.5 | 250.0 | 25.0 | 16.9 | 0.0   | 29.6 | 160.0 | 0.0   | 325.7 |
| Broccoli                         | Vegetable              | 40.7 | 1.2  | 67.9  | 65.5  | 20.0 | 8.1   | 106.9 | 0.0   | 0.0 | 22.7 | 32.9 | 40.0 | 0.0   | 126.2 | 189.4 | 26.5 | 32.1 | 93.7  | 27.5 | 209.4 | 0.0   | 1351  |
| Canned salmon, farmed fish       | Fish                   | 77.2 | 2.4  | 12.3  | 0.0   | 20.0 | 86.4  | 67.9  | 78.5  | 4.0 | 6.9  | 15.7 | 18.7 | 219.8 | 8.0   | 810.4 | 30.2 | 4.7  | 9.1   | 27.1 | 0.0   | 159.7 | 0.0   |
| Chicken egg                      | Eggs                   | 66.2 | 17.5 | 2.5   | 0.0   | 20.0 | 74.0  | 140.3 | 89.3  | 0.0 | 13.7 | 13.4 | 54.2 | 120.3 | 56.2  | 0.0   | 68.4 | 26.5 | 89.6  | 20.2 | 0.0   | 37.5  | 1.3   |
| Garden peas with carrots (can)   | Vegetable              | 40.4 | 10.3 | 60.7  | 132.4 | 20.0 | 9.2   | 72.7  | 9.9   | 0.0 | 43.1 | 25.6 | 42.6 | 0.0   | 46.0  | 215.5 | 21.6 | 43.8 | 292.4 | 21.5 | 6.3   | 0.0   | 129.1 |
| Plaice                           | Fish                   | 75.0 | 0.0  | 0.0   | 0.0   | 20.0 | 40.9  | 45.0  | 135.8 | 3.6 | 3.7  | 17.0 | 21.1 | 99.0  | 16.2  | 581.7 | 13.6 | 46.1 | 2.1   | 9.1  | 3.6   | 14.5  | 0.0   |
| Garden peas with carrots (glass) | Vegetable              | 40.4 | 10.3 | 60.7  | 132.4 | 20.0 | 9.2   | 72.7  | 9.9   | 0.0 | 43.1 | 25.6 | 42.6 | 0.0   | 46.0  | 215.5 | 21.6 | 43.8 | 292.4 | 21.5 | 6.3   | 0.0   | 129.1 |
| Apricots                         | Fruit                  | 15.5 | 0.0  | 0.0   | 68.0  | 20.0 | 0.0   | 36.4  | 0.0   | 0.0 | 37.5 | 31.4 | 10.6 | 0.0   | 15.2  | 500.0 | 31.3 | 63.5 | 278.7 | 35.3 | 45.5  | 0.0   | 47.1  |
| Coffee                           | Non-alcoholic drinks   | 17.2 | 0.0  | 0.0   | 0.0   | 20.0 | 13.3  | 0.0   | 0.0   | 0.0 | 31.3 | 85.7 | 5.3  | 0.0   | 0.0   | 1250  | 31.3 | 52.9 | 0.0   | 0.0  | 0.0   | 0.0   | 0.0   |
| Gourmet                          | Fish                   | 76.3 | 72.5 | 65.0  | 1.6   | 20.0 | 130.7 | 45.0  | 135.8 | 1.8 | 3.7  | 17.0 | 12.6 | 44.6  | 2.4   | 581.7 | 13.6 | 8.4  | 2.6   | 9.1  | 0.0   | 18.5  | 0.0   |
| Goat cheese, fresh               | Dairy                  | 45.7 | 8.9  | 20.6  | 0.0   | 20.0 | 6.6   | 82.4  | 0.0   | 0.0 | 0.0  | 6.2  | 10.5 | 14.4  | 13.2  | 0.0   | 37.1 | 2.1  | 35.4  | 0.0  | 0.0   | 1.3   | 5.1   |
| Cucumber with peel               | Vegetable              | 12.0 | 9.0  | 64.0  | 24.0  | 20.0 | 20.0  | 58.2  | 0.0   | 0.0 | 18.8 | 31.4 | 67.0 | 0.0   | 18.8  | 125.0 | 12.5 | 10.6 | 20.0  | 20.0 | 36.4  | 0.0   | 298.6 |
| Dutch shrimps                    | Fish                   | 50.9 | 0.4  | 1.2   | 0.0   | 20.0 | 54.7  | 37.7  | 66.1  | 1.4 | 66.2 | 14.9 | 28.6 | 626.1 | 5.7   | 121.3 | 31.7 | 4.7  | 0.2   | 3.7  | 0.0   | 1.0   | 0.0   |
| Bean sprouts                     | Vegetable              | 47.3 | 5.0  | 10.0  | 60.0  | 20.0 | 0.0   | 84.1  | 17.9  | 0.0 | 78.1 | 53.6 | 39.9 | 0.0   | 116.7 | 781.3 | 54.7 | 79.4 | 1.7   | 14.0 | 90.9  | 0.0   | 48.2  |

|                          |                      |      |     |      |      |      |      |       |      |     |      |      |      |     |       |       |      |      |      |      |       |     |      |
|--------------------------|----------------------|------|-----|------|------|------|------|-------|------|-----|------|------|------|-----|-------|-------|------|------|------|------|-------|-----|------|
| Soda, sugar and caffeine | Non-alcoholic drinks | 0.0  | 0.0 | 0.0  | 0.0  | 20.0 | 0.0  | 138.2 | 0.0  | 0.0 | 25.0 | 0.0  | 0.0  | 0.0 | 0.0   | 0.0   | 0.0  | 0.0  | 0.0  | 0.0  | 0.0   | 0.0 | 0.0  |
| Zucchini                 | Vegetable            | 25.8 | 1.0 | 32.0 | 44.0 | 20.0 | 14.7 | 92.7  | 14.3 | 0.0 | 6.3  | 62.9 | 33.0 | 0.0 | 93.9  | 312.5 | 31.3 | 52.9 | 44.0 | 55.9 | 27.3  | 0.0 | 60.0 |
| Strawberries             | Fruit                | 16.1 | 0.0 | 0.0  | 58.7 | 20.0 | 0.0  | 70.3  | 0.0  | 0.0 | 33.3 | 49.5 | 17.0 | 0.0 | 262.6 | 250.0 | 25.0 | 28.2 | 3.6  | 43.9 | 727.3 | 0.0 | 57.1 |
